# Supplementary material for: Ultra-thin carbon-shell coated Ru/RuO2@C with rich grain boundaries for efficient and durable acidic water oxidation
Source: Royal Society of Chemistry journal article supplement (doi:10.1039/d3ce00695f), 2023-01-01
Supplement: d3ce00695f1.pdf [file d3ce00695f1.pdf]

# Supporting Information

**Ultra-thin carbon-shell coated Ru/RuO<sub>2</sub>@C with rich grain boundaries for  
efficient and durable acidic water oxidation**

Qian Chen, Ruonan Wang, Lin Liu, Zhiming Guan, Zhibin Zhu<sup>\*a</sup>, Lixin Cao<sup>\*a</sup>, Bohua Dong<sup>\*a</sup>

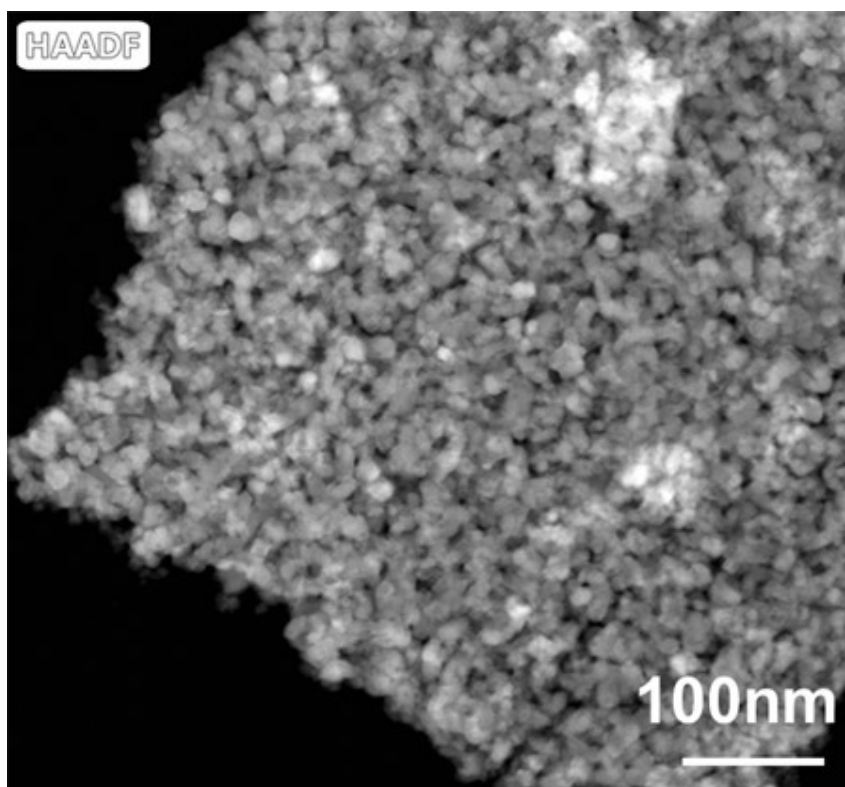

**Figure S1. HAADF-STEM image of Ru/RuO<sub>2</sub>@C-300.**

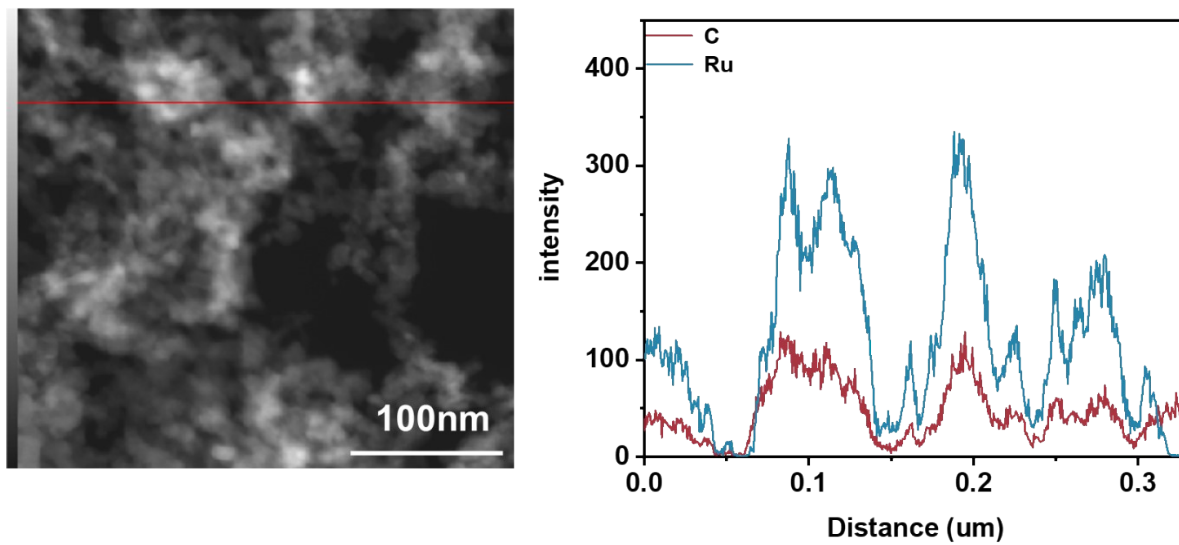

**Figure S2. EDS line scan of Ru/RuO<sub>2</sub>@C-300.**

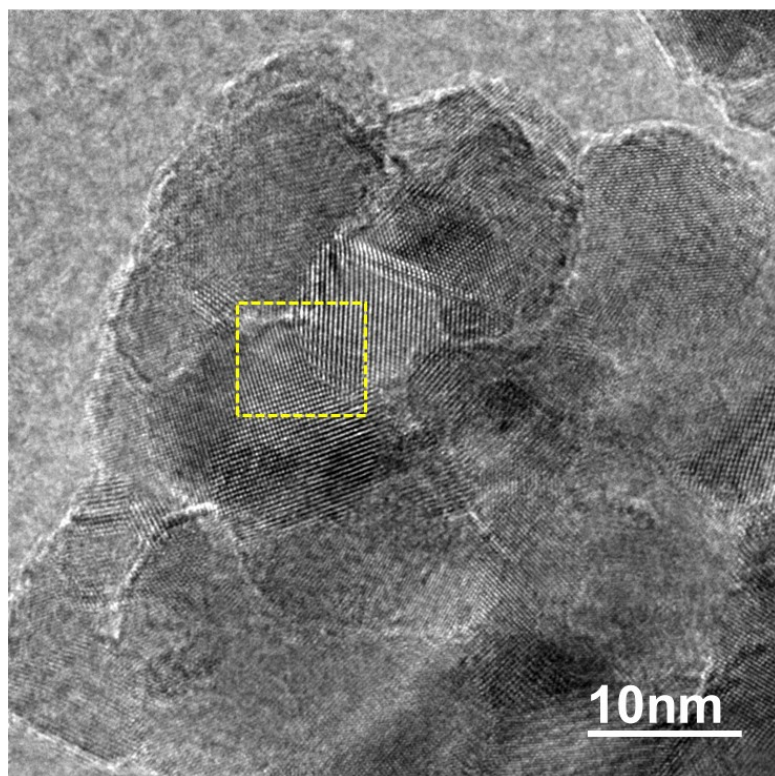

**Figure S3. The HRTEM images of Ru/RuO<sub>2</sub>@C-300.**

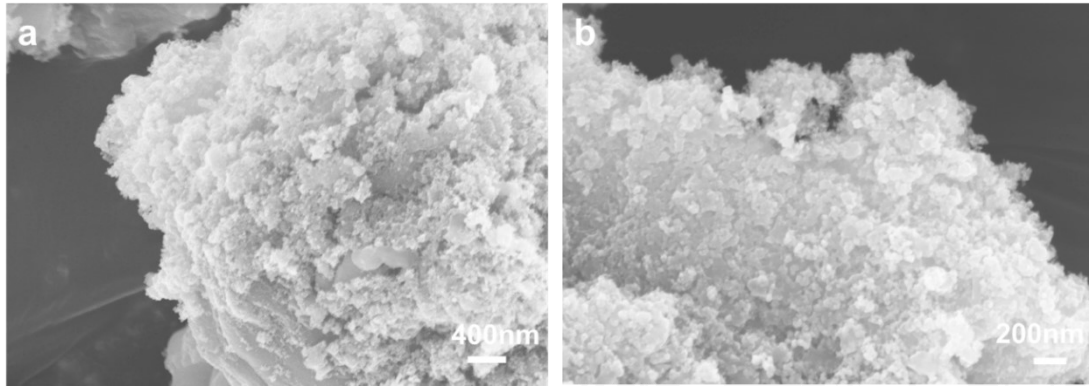

**Figure S4. (a)-(b) SEM image of Ru@C.**

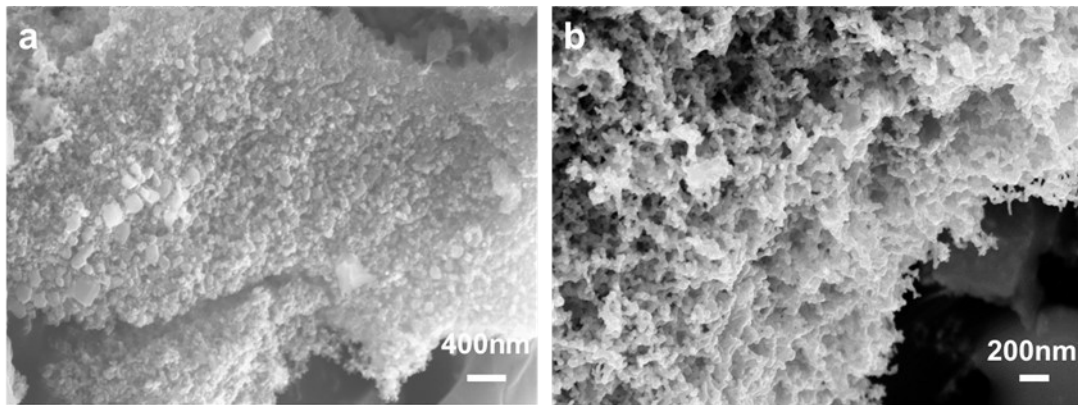

**Figure S5. (a)-(b) SEM image of Ru/RuO<sub>2</sub>@C-250.**

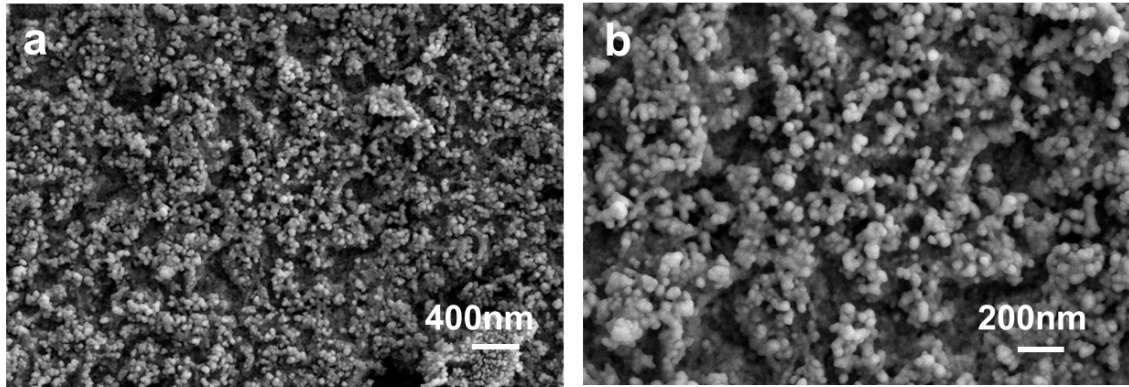

**Figure S6. (a)-(b) SEM image of Ru/RuO<sub>2</sub>@C-300.**

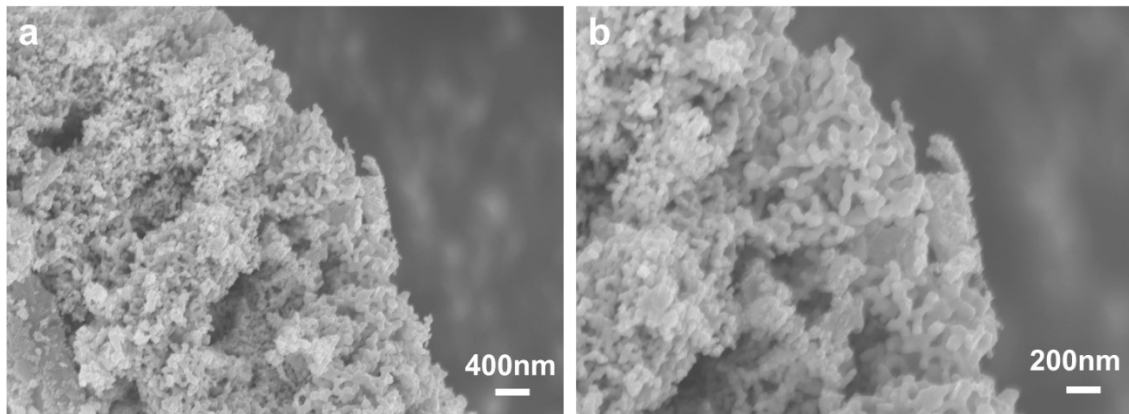

**Figure S7. (a)-(b) SEM image of Ru/RuO<sub>2</sub>@C-350.**

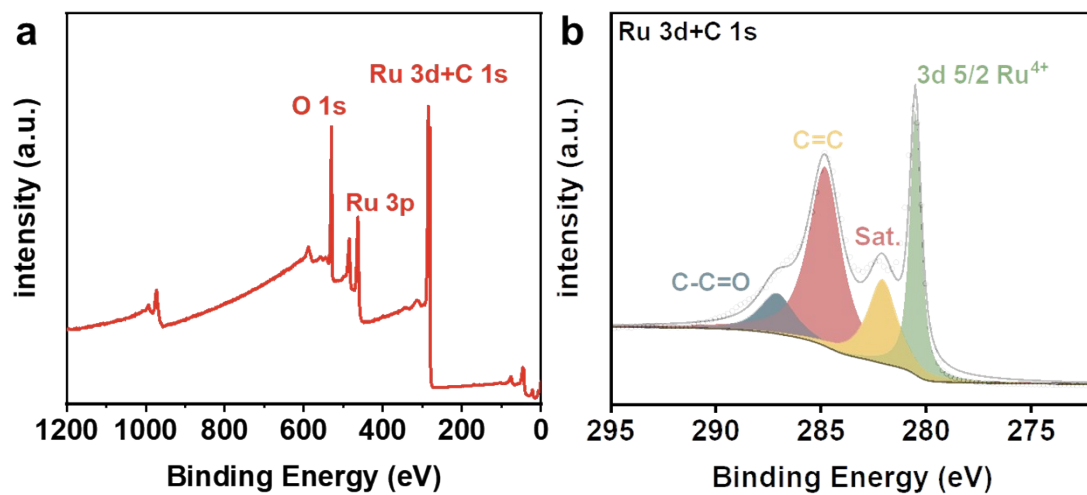

Figure S8. (a) XPS survey, (b) Ru 3d+C 1s of Ru/RuO<sub>2</sub>@C-300.

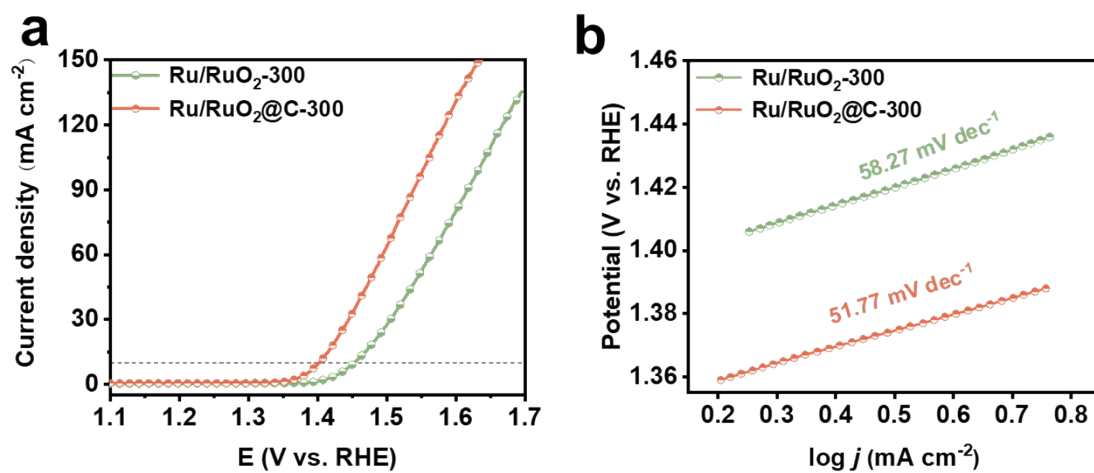

**Figure S9. Electrocatalytic performance of Ru/RuO<sub>2</sub>@C-300 and Ru/RuO<sub>2</sub>-300 catalysts in 0.5 M H<sub>2</sub>SO<sub>4</sub> solution with 90% iR compensation (a) LSV polarization curves. (b) Tafel plots.**



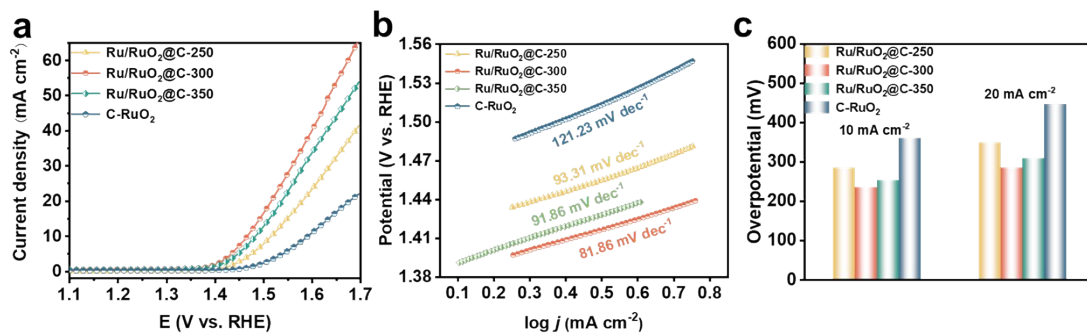

**Figure S10. Electrocatalytic performance of Ru/RuO<sub>2</sub>@C-250, Ru/RuO<sub>2</sub>@C-300, Ru/RuO<sub>2</sub>@C-350, and commercial RuO<sub>2</sub> catalysts in 0.5 M H<sub>2</sub>SO<sub>4</sub> solution without iR compensation (a) LSV polarization curves. (b) Tafel plots. (c) Overpotentials at a current density of 10 mA cm<sup>-2</sup> and 20 mA cm<sup>-2</sup>.**

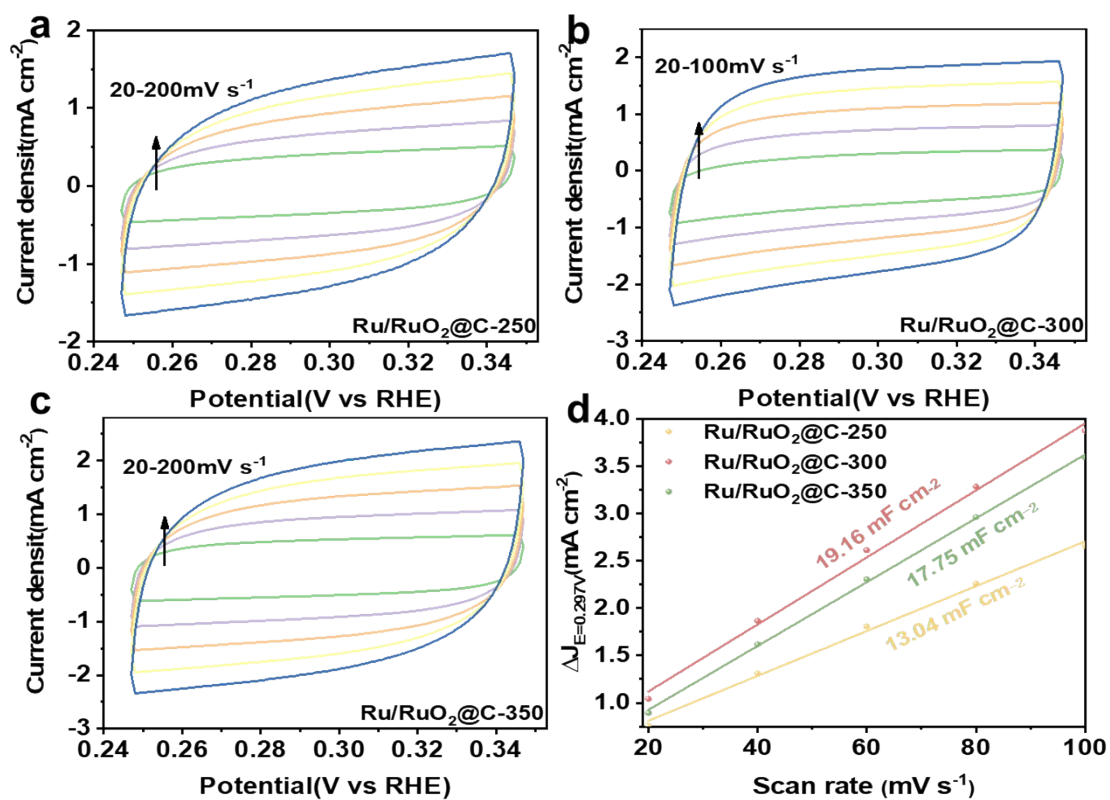

Figure S11. The CV curves of Ru/RuO<sub>2</sub>@C-250 (a), Ru/RuO<sub>2</sub>@C-300 (b), and Ru/RuO<sub>2</sub>@C-350 (c) with the scan rate ranging from 20 to 100 mV s<sup>-1</sup> in 0.5 M H<sub>2</sub>SO<sub>4</sub>, the Cdl values at the potential of 0.297 V (d).

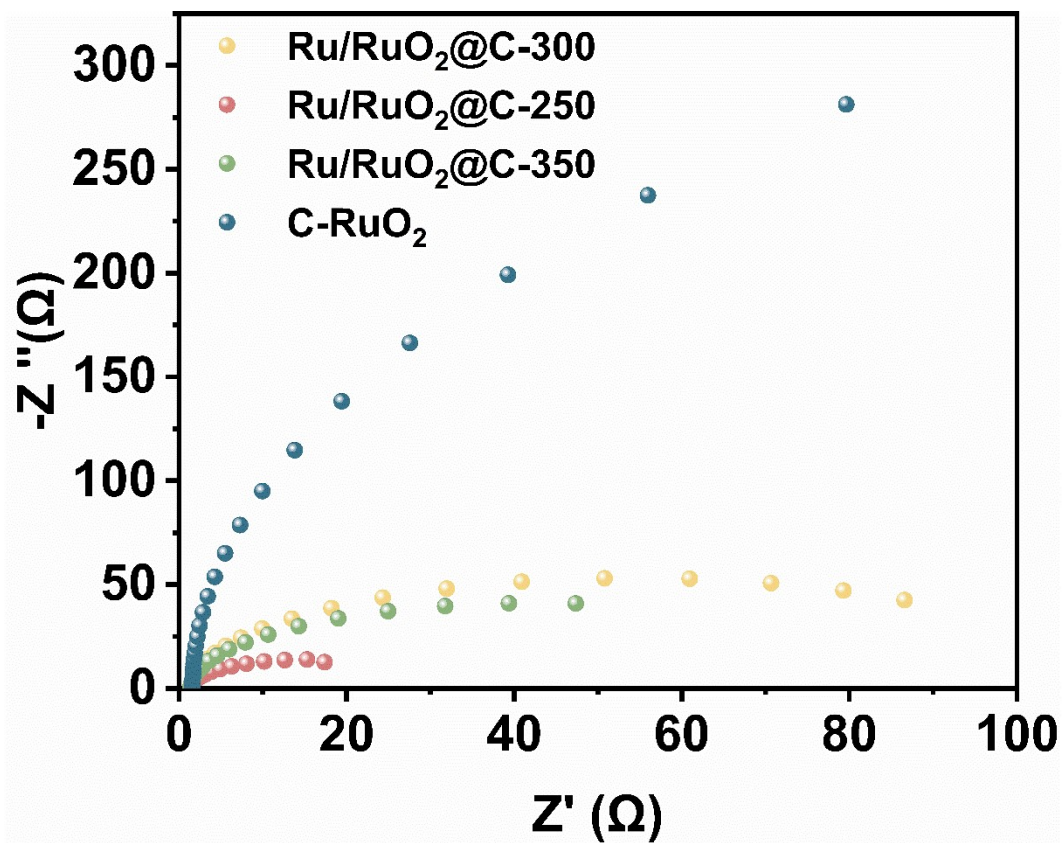

Figure S12. EIS plots of Ru/RuO<sub>2</sub>@C-250, Ru/RuO<sub>2</sub>@C-300, Ru/RuO<sub>2</sub>@C-350 and C-RuO<sub>2</sub>.

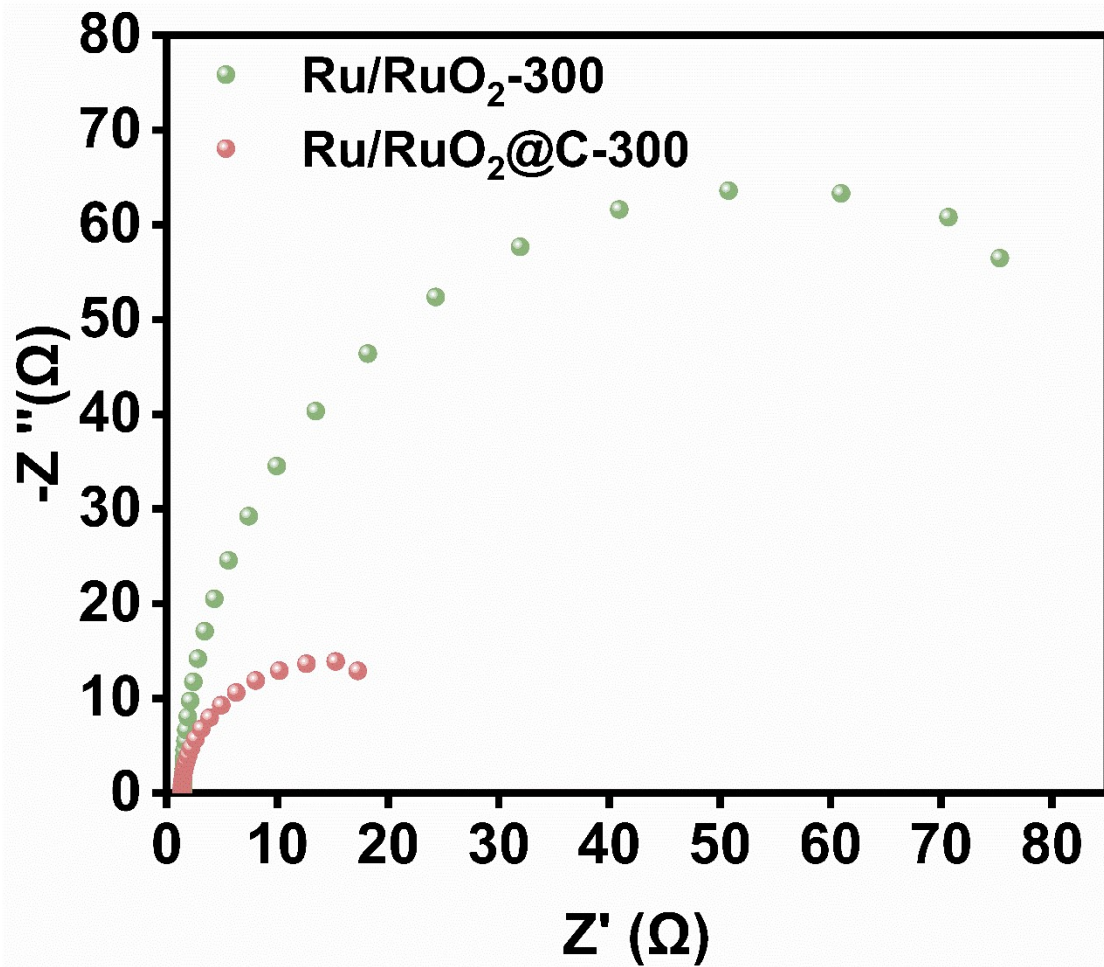

Figure S13. EIS plots of Ru/RuO<sub>2</sub>@C-300 and Ru/RuO<sub>2</sub>-300.

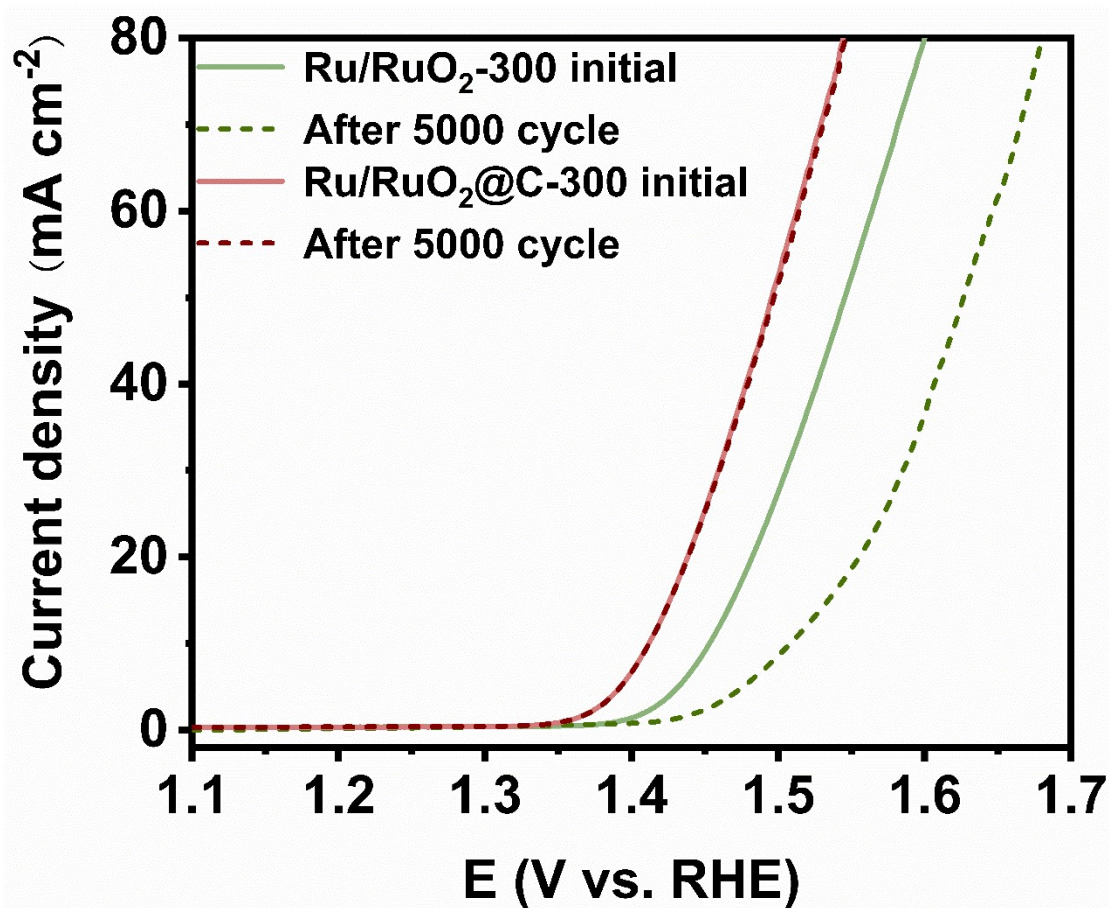

Figure S14. Linear sweep voltammograms of the Ru/RuO<sub>2</sub>@C-300 and Ru/RuO<sub>2</sub>-300 for OER were obtained before and after 5000 potential cycles.

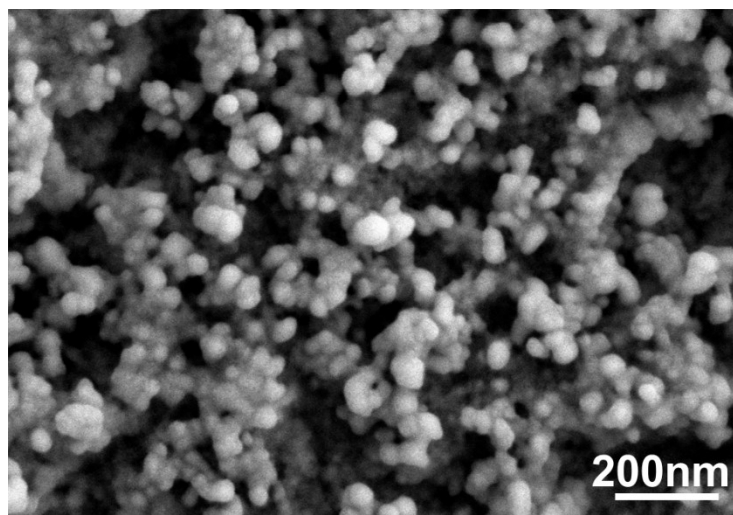

**Figure S15. SEM images of the Ru/RuO<sub>2</sub>@C-300 after the chronopotentiometry experiment.**

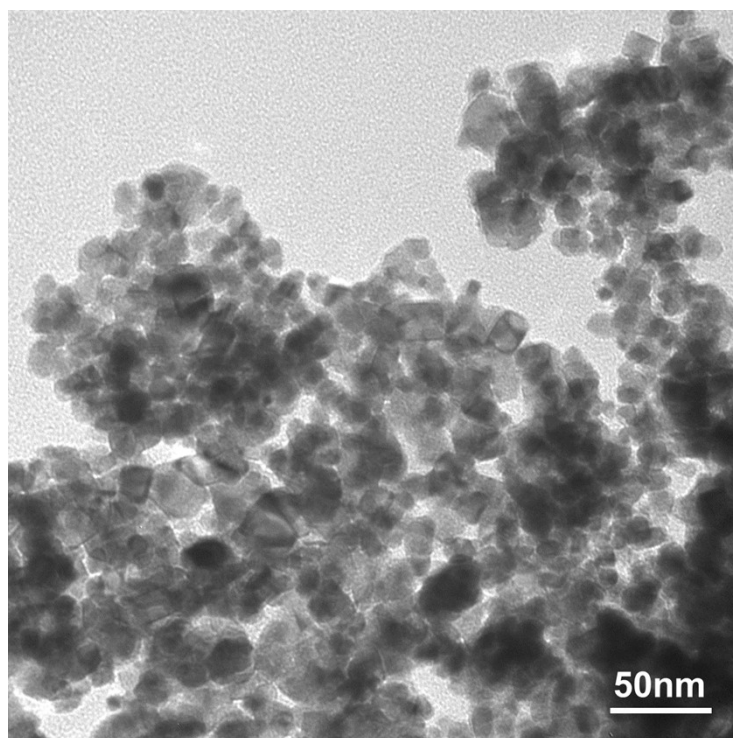

**Figure S16. TEM images of the Ru/RuO<sub>2</sub>@C-300 after the chronopotentiometry experiment.**

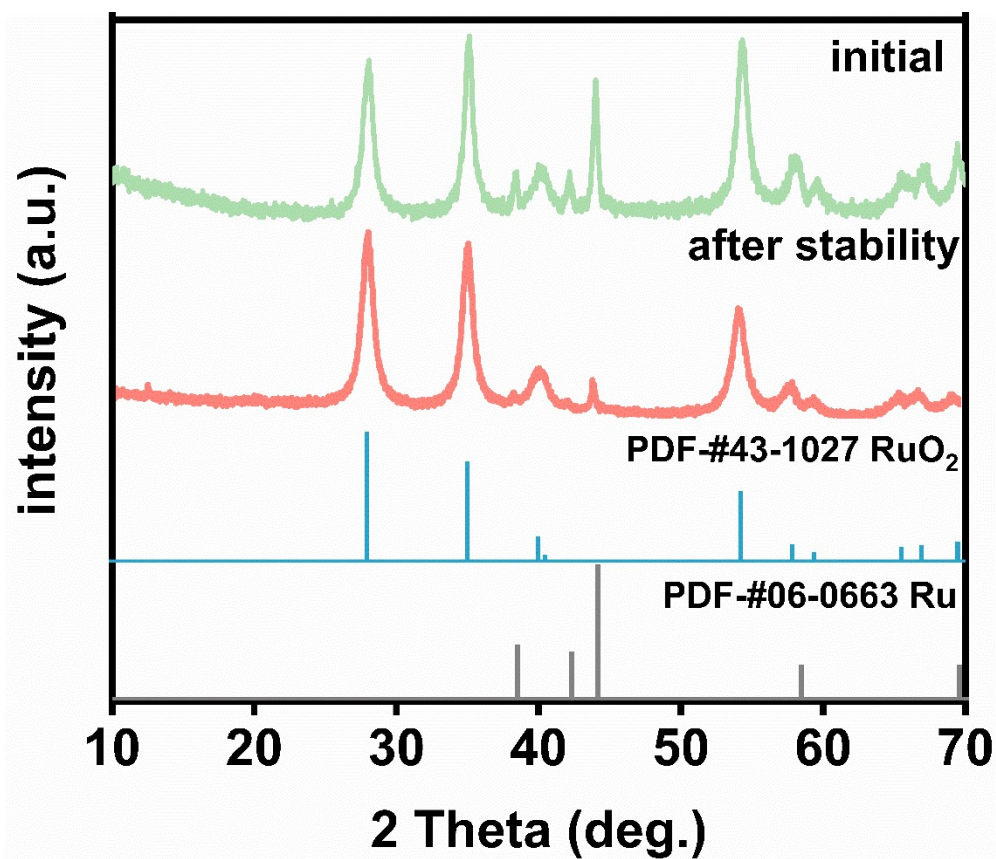

Figure S17. XRD for initial Ru/RuO<sub>2</sub>@C-300 and after stability Ru/RuO<sub>2</sub>@C-300.



**Table S1. Performance comparison of Ru/RuO<sub>2</sub>@C-300 with the state-of-art catalysts reported recently in acidic electrolytes.**

| Catalyst                                                            | Electrolyte                          | $\eta_{10}$<br>(mV) | Tafel<br>plots<br>(mV dec <sup>-1</sup> ) | Stability<br>(h)                      | Ref.         |
|---------------------------------------------------------------------|--------------------------------------|---------------------|-------------------------------------------|---------------------------------------|--------------|
| Ru/RuO <sub>2</sub> @C-300                                          | 0.5M H <sub>2</sub> SO <sub>4</sub>  | 173                 | 51.77                                     | 120@10mA cm <sup>-2</sup>             | This<br>Work |
| Cu <sub>0.3</sub> Ir <sub>0.7</sub> O <sub>6</sub>                  | 0.1 M<br>HClO <sub>4</sub>           | 351                 | 63                                        | 1.67h@ 1.68 V<br>v.s. RHE             | 1            |
| IrO <sub>2</sub> @RuO <sub>2</sub>                                  | 0.5M H <sub>2</sub> SO <sub>4</sub>  | 270                 | 57.8                                      | 1000 cycles@<br>0.3-1.2 V v.s.<br>RHE | 2            |
| 1D-RuO <sub>2</sub> -CN <sub>x</sub>                                | 0.5M H <sub>2</sub> SO <sub>4</sub>  | 250                 | 52                                        | 50 h@ 1.57 V<br>v.s. RHE              | 3            |
| Ir <sub>1</sub> Fe <sub>0.11</sub> /C                               | 0.5 M<br>HClO <sub>4</sub>           | 278                 | 62                                        | 3.6h @ 10 mA<br>cm <sup>-2</sup>      | 4            |
| Ir-Ni <sub>0.57</sub> Fe <sub>0.82</sub>                            | 0.5 M<br>HClO <sub>4</sub>           | 284                 | 48.6                                      | 5.6 h @ 10 mA<br>cm <sup>-2</sup>     | 5            |
| Ir nanoparticles                                                    | 0.5M H <sub>2</sub> SO <sub>4</sub>  | 290                 | 46                                        | 10 h @ 10 mA<br>cm <sup>-2</sup>      | 6            |
| RuO <sub>2</sub> /Co <sub>3</sub> O <sub>4</sub> -R<br>uCo@NC       | 0.5M H <sub>2</sub> SO <sub>4</sub>  | 247                 | 89                                        | 8 h @ 10 mA<br>cm <sup>-2</sup>       | 7            |
| 0..27-RuO <sub>2</sub> @C                                           | 0.5M H <sub>2</sub> SO <sub>4</sub>  | 220                 | 66                                        |                                       | 8            |
| Y <sub>1.85</sub> Ba <sub>0.15</sub> Ru <sub>2</sub> O <sub>7</sub> | 0.5M H <sub>2</sub> SO <sub>4</sub>  | 278                 | 40.8                                      | 4 h @ 10 mA<br>cm <sup>-2</sup>       | 9            |
| Ru NCs/Co <sub>2</sub> P                                            | 0.5M H <sub>2</sub> SO <sub>4</sub>  | 197                 | 89                                        | 10 h @ 12 mA<br>cm <sup>-2</sup>      | 10           |
| Ru@IrO <sub>x</sub>                                                 | 0.05M H <sub>2</sub> SO <sub>4</sub> | 282                 | 69.1                                      | 24 h @ 1.55 V<br>vs. RHE              | 11           |

|                                                        |                                     |     |       |                                |    |
|--------------------------------------------------------|-------------------------------------|-----|-------|--------------------------------|----|
| Mg-doping                                              | 0.5M H <sub>2</sub> SO <sub>4</sub> | 228 | 48.66 | 30 h @ 10 mA                   | 12 |
| RuO <sub>2</sub>                                       |                                     |     |       | cm <sup>-2</sup>               |    |
| Ni-Ru@                                                 | 0.5M H <sub>2</sub> SO <sub>4</sub> | 184 | 44    | 30 h @ 10 mA                   | 13 |
| RuOx-HL                                                |                                     |     |       | cm <sup>-2</sup>               |    |
| IrO <sub>2</sub> -BN-rGO                               | 0.5M H <sub>2</sub> SO <sub>4</sub> | 300 | 72.1  | 12350 cycles @<br>0.30-0.33 V  | 14 |
| CP@NCNT                                                | 0.5M H <sub>2</sub> SO <sub>4</sub> | 317 | 75    | 24 h @ 1.565 V<br>v.s. RHE     | 15 |
| Ultrafine                                              | 0.5M H <sub>2</sub> SO <sub>4</sub> | 179 | 36.9  | 20 h @ 10 mA                   | 16 |
| Defective                                              |                                     |     |       | cm <sup>-2</sup>               |    |
| RuO <sub>2</sub>                                       |                                     |     |       |                                |    |
| Mn <sub>0.73</sub> Ru <sub>0.27</sub> O <sub>2.6</sub> | 0.5M H <sub>2</sub> SO <sub>4</sub> | 208 | 65.3  | 10 h@10 mA<br>cm <sup>-2</sup> | 17 |

## References

1. W. Sun, Y. Song, X. Q. Gong, L. M. Cao and J. Yang, *Chem Sci*, 2015, **6**, 4993-4999.
2. T. Audichon, T. W. Napporn, C. Canaff, C. Morais, C. Comminges and K. B. Kokoh, *The Journal of Physical Chemistry C*, 2016, **120**, 2562-2573.
3. T. Bhowmik, M. K. Kundu and S. Barman, *ACS Appl Mater Interfaces*, 2016, **8**, 28678-28688.
4. L. Fu, P. Cai, G. Cheng and W. Luo, *Sustainable Energy & Fuels*, 2017, **1**, 1199-1203.
5. L. Fu, G. Cheng and W. Luo, *Journal of Materials Chemistry A*, 2017, **5**, 24836-24841.
6. J. Zhang, G. Wang, Z. Liao, P. Zhang, F. Wang, X. Zhuang, E. Zschech and X. Feng, *Nano Energy*, 2017, **40**, 27-33.
7. Z. Fan, J. Jiang, L. Ai, Z. Shao and S. Liu, *ACS Appl Mater Interfaces*, 2019, **11**, 47894-47903.
8. H.-S. Park, J. Yang, M. K. Cho, Y. Lee, S. Cho, S.-D. Yim, B.-S. Kim, J. H. Jang and H.-K. Song, *Nano Energy*, 2019, **55**, 49-58.
9. Q. Feng, J. Zou, Y. Wang, Z. Zhao, M. C. Williams, H. Li and H. Wang, *ACS Appl Mater Interfaces*, 2020, **12**, 4520-4530.
10. Y. Deng, L. Yang, Y. Wang, L. Zeng, J. Yu, B. Chen, X. Zhang and W. Zhou, *Chinese Chemical Letters*, 2021, **32**, 511-515.
11. J. Shan, C. Guo, Y. Zhu, S. Chen, L. Song, M. Jaroniec, Y. Zheng and S.-Z. Qiao, *Chem*, 2019, **5**, 445-459.

12. Y. Li, L. Xing, D. Yu, A. Libanori, K. Yang, J. Sun, A. Nashalian, Z. Zhu, Z. Ma, Y. Zhai and J. Chen, *ACS Applied Nano Materials*, 2020, **3**, 11916-11922.
13. A. M. Harzandi, S. Shadman, A. S. Nissimagoudar, D. Y. Kim, H. D. Lim, J. H. Lee, M. G. Kim, H. Y. Jeong, Y. Kim and K. S. Kim, *Advanced Energy Materials*, 2021, **11**.
14. P. Joshi, R. Yadav, M. Hara, T. Inoue, Y. Motoyama and M. Yoshimura, *Journal of Materials Chemistry A*, 2021, **9**, 9066-9080.
15. D. Yang, W. Hou, Y. Lu, W. Zhang and Y. Chen, *Journal of Energy Chemistry*, 2021, **52**, 130-138.
16. R. Ge, L. Li, J. Su, Y. Lin, Z. Tian and L. Chen, *Advanced Energy Materials*, 2019, **9**.
17. K. Wang, Y. Wang, B. Yang, Z. Li, X. Qin, Q. Zhang, L. Lei, M. Qiu, G. Wu and Y. Hou, *Energy & Environmental Science*, 2022, **15**, 2356-2365.
